# Supplementary material for: Dietary restriction and aerobic exercise alleviate obesity-related skeletal muscle impairment via the miR-130/PPARγ axis and IGF-1/Akt/mTOR signaling activation
Source: Research Square preprint supplement (doi:10.21203/rs.3.rs-8116495/v1), 2025-12-03
Supplement: Supplementary file 1 [file 648a332fca523db83275164a.xlsx]

## Sheet: Table Contents
Supplementary Table Contents
Supplementary Table 1:Body Weight.
Supplementary Table 2: Lee’s Index

## Sheet: Supplementary Table 1
Supplementary Table 1: Body Weight.
group	ID	Week1	Week2	Week3	Week4	Week5	Week6	Week7	Week8	Week9	Week10	Week11	Week12	Week13
O	O1	215.2	240.8	268.5	297.3	330.1	362.4	390.2	415.7	434.6	451.2	465.8	478.9	492.3
O	O2	205.8	229.4	255.1	283.6	314.9	345.8	372.1	396.8	414.2	429.5	442.7	454.3	465.1
O	O3	218.5	244.1	272.3	301.5	334.8	367.2	395.5	421.3	440.8	457.9	472.1	485.6	498.7
O	O4	202.3	225.7	251.4	279.8	310.2	340.5	367.8	392.1	409.5	424.8	437.2	448.9	459.5
O	O5	212.7	237.5	265.9	294.2	327.5	359.8	387.9	412.6	430.1	446.5	460.3	473.2	486.9
O	O6	208.9	232.6	259.7	287.9	319.3	350.1	377.4	401.5	419.7	435.6	449.8	462.1	474.3
O	O7	220.1	246.8	275.6	305.1	339.6	371.9	400.1	426.8	445.9	463.7	478.5	492.3	505.2
O	O8	207.4	230.9	257.8	285.4	316.7	347.6	374.2	398.9	416.3	432.1	445.6	458.7	470.8
C	C1	210.5	229.8	249.7	270.3	291.5	309.8	327.4	342.6	355.8	367.1	376.5	384.2	390.7
C	C2	203.2	221.5	240.8	260.9	281.7	299.6	316.8	331.5	344.2	355.3	364.7	372.1	378.5
C	C3	213.8	233.1	253.4	274.6	296.2	314.5	332.1	347.8	361.1	372.5	382.1	389.9	396.3
C	C4	200.7	218.9	238.1	258.2	278.9	297.3	314.2	328.9	341.5	352.7	361.9	369.5	375.9
C	C5	211.9	231.4	251.2	272.5	293.8	312.1	329.7	345.2	358.4	369.8	379.3	387.1	393.5
C	C6	205.6	224.3	243.5	263.7	285.1	302.8	319.5	334.6	347.9	359.2	368.5	376.3	382.8
C	C7	215.1	235.7	255.9	277.8	299.4	317.2	334.8	350.1	363.7	375.2	384.9	392.7	399.1
C	C8	202.8	220.6	241.3	261.4	283.2	300.5	317.9	332.1	345.1	356.5	365.8	373.6	379.9
DR	DR1	216.3	241.9	269.7	298.6	331.5	364.1	392.3	418.2	437.5	454.1	468.9	482.1	410.5
DR	DR2	204.7	228.3	254.2	282.5	313.8	343.9	370.5	394.7	412.8	428.9	441.6	453.2	395.8
DR	DR3	219.8	245.5	273.9	303.1	336.7	368.5	397.8	423.6	443.2	460.5	475.3	488.7	415.2
DR	DR4	201.5	224.6	250.1	278.3	308.9	338.7	365.9	389.9	407.3	423.5	436.1	447.8	390.3
DR	DR5	213.6	238.7	267.1	295.8	329.2	361.4	389.7	414.5	432.9	449.8	463.7	476.5	405.9
DR	DR6	207.8	231.5	258.6	286.7	318.1	348.5	375.6	399.8	417.6	434.2	448.5	460.9	400.7
DR	DR7	221.4	248.2	276.8	306.9	341.3	373.2	402.5	428.9	448.7	465.9	480.1	494.2	420.1
DR	DR8	206.1	229.8	256.3	284.1	315.4	345.2	372.8	396.5	415.1	431.6	444.9	457.3	398.2
ET	ET1	214.8	239.5	267.8	296.4	328.7	360.9	388.6	413.2	431.8	448.5	462.9	475.8	440.6
ET	ET2	203.9	227.1	253.4	281.2	312.5	342.3	369.1	393.4	411.2	427.8	440.3	451.9	425.3
ET	ET3	217.6	242.8	271.5	300.2	333.4	365.7	393.8	419.1	438.5	455.2	469.7	482.6	445.9
ET	ET4	200.1	223.4	248.9	276.8	307.6	337.1	364.5	388.2	405.7	421.9	434.5	446.1	420.1
ET	ET5	212.1	236.9	264.7	293.1	325.9	358.2	386.1	410.5	429.3	445.7	459.8	472.4	437.8
ET	ET6	206.5	230.1	256.8	284.5	316.2	346.8	373.2	397.6	414.9	432.5	446.8	459.2	432.7
ET	ET7	219.3	245.2	274.6	303.8	337.9	369.5	398.4	424.7	443.6	460.8	475.9	488.5	450.2
ET	ET8	204.3	226.7	252.1	280.3	311.8	341.5	368.7	392.1	410.3	426.7	439.6	450.8	423.5
ET+DR	ET+DR1	217.1	242.5	270.3	299.2	332.8	365.4	393.7	419.8	439.1	456.3	470.5	483.9	385.7
ET+DR	ET+DR2	205.2	229.1	255.6	283.9	315.3	345.7	372.4	396.3	415.7	431.8	444.9	456.8	370.4
ET+DR	ET+DR3	220.6	246.9	275.1	304.7	338.2	370.1	399.2	425.3	445.8	463.1	477.8	491.2	390.8
ET+DR	ET+DR4	201.9	225.3	251.7	279.5	309.8	339.6	367.1	391.5	409.1	425.6	438.2	449.7	365.9
ET+DR	ET+DR5	214.5	239.9	268.5	297.8	330.6	362.9	391.2	416.9	436.2	453.5	467.3	480.1	381.5
ET+DR	ET+DR6	208.3	232.4	259.9	287.3	319.5	349.8	376.9	400.7	418.9	435.9	449.7	462.5	375.2
ET+DR	ET+DR7	222.1	249.8	278.4	307.5	342.1	374.6	403.5	429.8	449.9	466.7	481.2	495.8	395.3
ET+DR	ET+DR8	206.7	231.2	257.4	285.6	317.1	347.3	374.5	398.2	417.4	433.2	446.5	459.1	372.8

## Sheet: Supplementary Table 2
Supplementary Table 2: Lee’s Index
group	ID	Week8	Week13
O	O1	30.9	32
O	O2	30.4	31.4
O	O3	31.1	32.2
O	O4	30.2	31.2
O	O5	30.8	31.8
O	O6	30.5	31.5
O	O7	31.2	32.3
O	O8	30.3	31.4
C	C1	28.2	30
C	C2	27.9	29.7
C	C3	29.3	30.1
C	C4	28.8	29.6
C	C5	29.1	30
C	C6	29	29.8
C	C7	29.4	30.2
C	C8	27.9	29.7
DR	DR1	30.8	30.5
DR	DR2	30.3	29.9
DR	DR3	31	30.7
DR	DR4	30.1	29.7
DR	DR5	30.7	30.3
DR	DR6	30.4	30.1
DR	DR7	31.1	30.8
DR	DR8	30.2	29.8
ET	ET1	30.7	30.9
ET	ET2	30.2	30.4
ET	ET3	30.9	31.1
ET	ET4	30	30.2
ET	ET5	30.6	30.8
ET	ET6	30.3	30.6
ET	ET7	31	31.2
ET	ET8	30.1	30.3
ET+DR	ET+DR1	30.9	29.6
ET+DR	ET+DR2	30.4	29.2
ET+DR	ET+DR3	31.1	29.8
ET+DR	ET+DR4	30.2	29
ET+DR	ET+DR5	30.8	29.5
ET+DR	ET+DR6	30.5	29.3
ET+DR	ET+DR7	31.2	29.9
ET+DR	ET+DR8	30.3	29.1
